# Supplementary material for: Tolerance of Yarrowia lipolytica to inhibitors commonly found in lignocellulosic hydrolysates
Source: PubMed Central journal article supplement (PMC7938539; doi:10.1186/s12866-021-02126-0), 2021-03-08
Supplement: 12866_2021_2126_MOESM3_ESM.pdf [file 12866_2021_2126_MOESM3_ESM.pdf]

## Supplementary

### Tolerance of *Yarrowia lipolytica* to inhibitors commonly found in lignocellulosic hydrolysates

Oliver Konzock<sup>1,\*</sup>, Simone Zaghen<sup>1,\*</sup>, Joakim Norbeck<sup>1#</sup>

1 Chalmers University of Technology, Department of Biology and Biological Engineering, division of Systems and Synthetic Biology, Göteborg, Sweden

\* these authors contributed equally to this work

# Corresponding author: norbeck@chalmers.se

## Content

- Supplementary figures
- List of plasmids
- List of primers
- List of sequences

## Supplementary figures

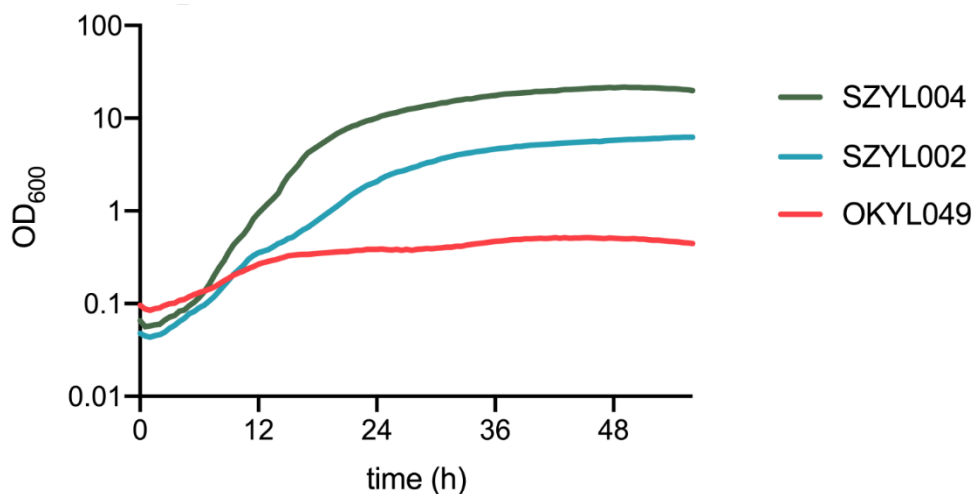

**Figure S1: Growth curves of *Y. lipolytica* strains expressing xylose genes.** Strains were precultured for 18 hours in LPU media with 10% glucose and then grown in LPU media with 10% xylose as sole-carbon source. Cells were cultured in 96-well plates and the OD<sub>600</sub> was measured with the growth profiler every 30 minutes. The curves represent the average of triplicates.

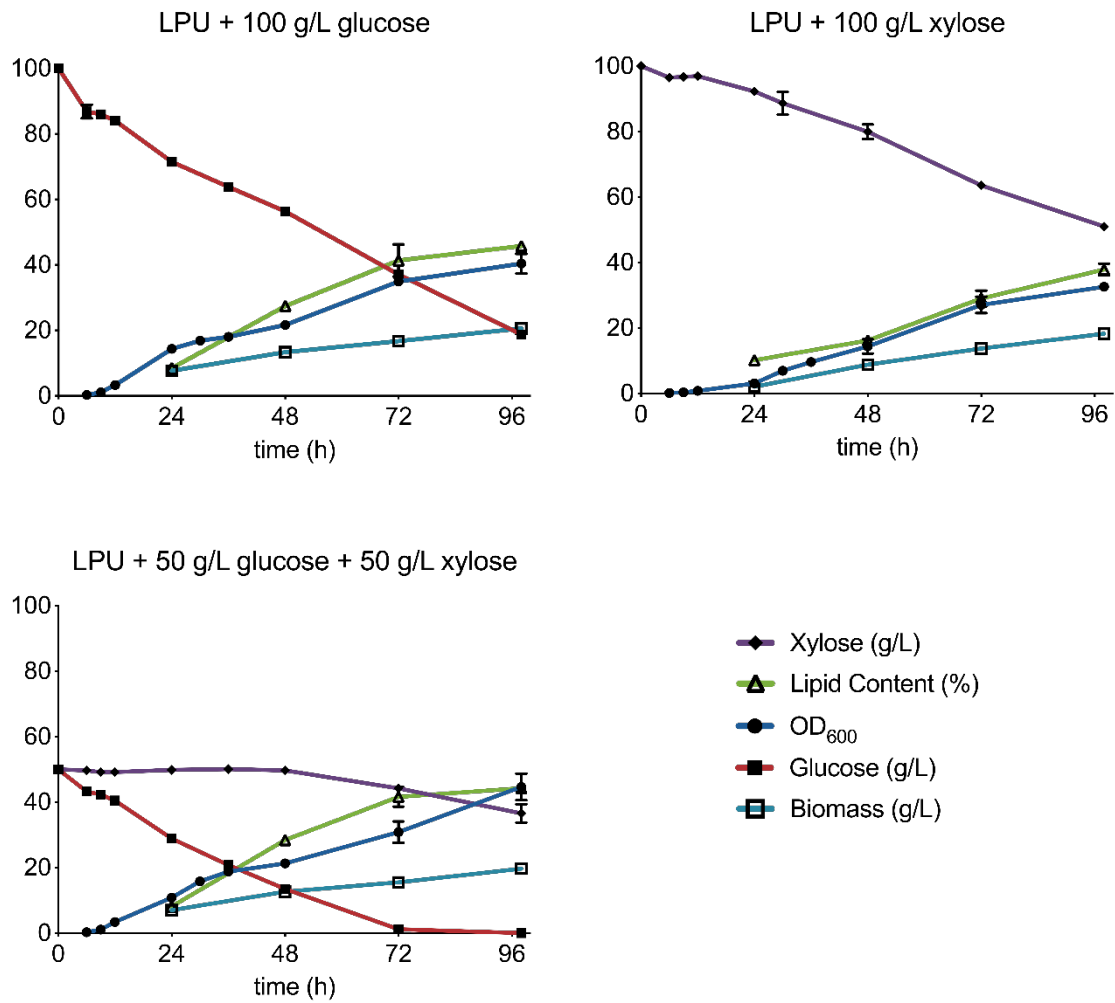

**Figure S2: Shake flask cultivation of SZYL004 on different carbon sources.** Glucose, xylose, OD<sub>600</sub>, biomass and lipid content curves of SZYL004 on LPU containing different percentages of glucose and xylose as carbon sources. Strains were cultured in shake flasks for 96 hours. The curves represent the average, and error bars the standard deviation of triplicates, respectively.

**Supplementary list 1: List of plasmids used in the study - Konzock, Zaghen, Norbeck 2021**

| Name            | Plasmid contains                                                         | Yarrowia marker | Purpose of plasmid                                                                      | Reference                                                                                                                                                                            |
|-----------------|--------------------------------------------------------------------------|-----------------|-----------------------------------------------------------------------------------------|--------------------------------------------------------------------------------------------------------------------------------------------------------------------------------------|
| <b>pCfB6630</b> | gRNA C3 locus                                                            | nourseothricin  | expresses gRNA for cut in C3 locus of YaliEASYCLONE kit                                 | <a href="#">EasyCloneYALI: CRISPR/Cas9-Based Synthetic Toolbox for Engineering of the Yeast <i>Yarrowia lipolytica</i>. Holkenbrink C, Dam MI, Kildegaard KR, Beder J, Dahlin J.</a> |
| <b>pCfB6633</b> | gRNA E1 locus                                                            | nourseothricin  | expresses gRNA for cut in E1 locus of YaliEASYCLONE kit                                 |                                                                                                                                                                                      |
| <b>SZ_EC_01</b> | (pTef1+XK+tPex20)-<br>(pGAPDH+XDH+tLip2) in Int_C3                       | marker-free     | cut with NotI to linearize repair fragment for C3 locus, overexpressing XK, and XDH     | this paper                                                                                                                                                                           |
| <b>SZ_EC_02</b> | (pTef1+XK+tPex20)-<br>(pGAPDH+XDH+tLip2)-<br>(pPYK1+XR+tPex16) in Int_C3 | marker-free     | cut with NotI to linearize repair fragment for C3 locus, overexpressing XK, XDH, and XR | this paper, available on Addgene                                                                                                                                                     |
| <b>OKEC012</b>  | pTef1in+DGA1+tPEX20 in Int_E1                                            | marker-free     | cut with NotI to linearize repair fragment for E1 locus, overexpressing DGA1            | this paper                                                                                                                                                                           |

**Supplementary list 2: List of primer sequences used in the study - Konzock, Zaghen, Norbeck 2021**

|                                                               | Name                | Sequence                                                                                               | Target                                                                                  |
|---------------------------------------------------------------|---------------------|--------------------------------------------------------------------------------------------------------|-----------------------------------------------------------------------------------------|
| <b>repair fragments for deletion</b>                          | are1_deletion-box-1 | ggggcaaaaaggatacaagtcgttcttacaagactctccgcacacacagcagctcgcttcaccac<br>ttgtcctatagaatgtcaaccactgtcaac    | fused together to form repair fragment for ARE1 deletion                                |
|                                                               | are1_deletion-box-2 | gttgacagtgttgacattctataggcacaagtggtgaagcgactgtgctgtgtgctgagagtgctt<br>gtaagaacgactgtatcctttttgcccc     |                                                                                         |
|                                                               | MHY1_deletion_box1  | cgccaaaaccatccaatcgaaaaaataaaagtcatagtacattatcgccaaaaggtagagcgccttc<br>tagtctccgctccattttttatgttaaccag | fused together to form repair fragment for MHY1 deletion                                |
|                                                               | MHY1_deletion_box2  | ctggttacaataaaaaaatggagcggagactagaaggcctctaccttttggcgataatgtactatgac<br>ttttgttttcgattgggatggtttggcg   |                                                                                         |
| <b>cut sites to build gRNA plasmids *</b>                     | ARE1_Cut-site_FW    | gaagagctcaatgtgcccgagttttagagct                                                                        | cut sites for ARE1                                                                      |
|                                                               | ARE1_Cut-Site_RV    | tcgggcacattgagctcttcaaccaacct                                                                          |                                                                                         |
|                                                               | ARE1_Cut-site_2_FW  | gtttctgcagcatggccaggttttagagct                                                                         |                                                                                         |
|                                                               | ARE1_Cut-Site_2_RV  | ctggccatgctgcagaaaaataaccaacct                                                                         |                                                                                         |
|                                                               | cut sites for MHY1  | MHY1_cut-site_1_FW                                                                                     | aggcgacagcatgtaaagggttttagagct                                                          |
|                                                               |                     | MHY1_cut-site_1_RV                                                                                     | ccatttacatgctgctccttaaccaacct                                                           |
|                                                               |                     | MHY1_cut-site_2_FW                                                                                     | ctcgagaggcgagtaagtggttttagagct                                                          |
|                                                               |                     | MHY1_cut-site_2_RV                                                                                     | ccacttactgcctctcgagtaaccaacct                                                           |
| <b>screening primer for deletions</b>                         | are1-del_FW_Screen  | tgttgctgggtaagtcaaacc                                                                                  | ARE1 deletion screening: 616 bp for deletion / 2248 bp for WT                           |
|                                                               | are1-del_RV_Screen  | aacttcagtgaagcattgtagc                                                                                 |                                                                                         |
|                                                               | MHY1-del_FW_Screen  | tcttcaaccgtcccacacc                                                                                    | MHY1 deletion screening: 675 bp deletion / 1533 bp MHY1 WT                              |
|                                                               | MHY1-del_RV_Screen  | caaagtggacaagcgactgc                                                                                   |                                                                                         |
| <b>primer to build plasmid with xylose pathway (SZ_EC_02)</b> | XK_Gibson_FW        | ACACTTCAACGGAATGCGTGCATtatttctccaggcaggcg                                                              | Primers with overhangs used to create the fragments for the gibbon assembly of SZ_EC_02 |
|                                                               | XK_Gibson_RV        | agaatcattcaaatgtatctcggactggatctttcg                                                                   |                                                                                         |
|                                                               | Tef1_Gibson_FW      | gtccgagatacatttgaatgattcttatactcagaaggaaatgc                                                           |                                                                                         |
|                                                               | Tef1_Gibson_RV      | attcaaccgcatcgagagaccgggtggcggcg                                                                       |                                                                                         |
|                                                               | GAPDH_Gibson_FW     | ccggtctctgcatcgggttgaatgaatcggccg                                                                      |                                                                                         |
|                                                               | GAPDH_Gibson_RV     | ggttagaagacattgtgatgtgtttaaattc                                                                        |                                                                                         |
|                                                               | XDH_Gibson_FW       | acacacatcaacaatgtcttcaaccgtcattg                                                                       |                                                                                         |
|                                                               | XDH_Gibson_RV       | CCGAACAGAAGGAATGCACGCGTActactctctcggaccgtc                                                             |                                                                                         |
|                                                               | pPYK1_Gibson_FW     | gcttgaaggacattgtaactgtggtgtaattctcc                                                                    |                                                                                         |
|                                                               | pPYK1_Gibson_RV     | gccgattcattcaaccGCGattgctgcttctgtttg                                                                   |                                                                                         |
|                                                               | XR_Gibson_FW        | aatcatcaatccttaggcgaaatgggaaggttag                                                                     |                                                                                         |
|                                                               | XR_Gibson_RV        | caccacagttacaatgtcctcaagctgcctc                                                                        |                                                                                         |

|                                          |                 |                                           |                                                                                                                   |
|------------------------------------------|-----------------|-------------------------------------------|-------------------------------------------------------------------------------------------------------------------|
|                                          | pex16_Gibson_FW | cgccgccaacccggctctgataagcttcgagaagcccgaac |                                                                                                                   |
|                                          | pex16_Gibson_RV | catttcgcctaagcgattgatgattggaacac          |                                                                                                                   |
| <b>screening primers for integration</b> | PR-14838        | aaacctgtcgtatgagctac                      | screening of C3 locus: positive integration: RP-14838 + RP-8859 = 915 bp; negative: RP-14838 + RP-14588 = 1106 bp |
|                                          | PR-8859         | aagtgtgatggggaagtgag                      |                                                                                                                   |
|                                          | PR-14588        | acgcgaaattattgcacaggacacac                | screening of E1 locus: positive integration RP-14442 + RP-8859 = 891 bp; negative RP-14442 + RP-14398             |
|                                          | PR-14442        | agtttgaccaagacaaatg                       |                                                                                                                   |
|                                          | PR-14398        | cacgcgaugttagaagcaattggagaag              |                                                                                                                   |

\* Marked in orange are USER cloning overhangs, black are the 20 nt CRISPR recognition sites.



|                   |        |  |  |                                                                                                                                                                                                                                                                                                                                                                                                                                                                                                                                                                                                                                                                                                                                                                                                                                                                                                                                                                                             |
|-------------------|--------|--|--|---------------------------------------------------------------------------------------------------------------------------------------------------------------------------------------------------------------------------------------------------------------------------------------------------------------------------------------------------------------------------------------------------------------------------------------------------------------------------------------------------------------------------------------------------------------------------------------------------------------------------------------------------------------------------------------------------------------------------------------------------------------------------------------------------------------------------------------------------------------------------------------------------------------------------------------------------------------------------------------------|
| <b>Terminator</b> | tPEX20 |  |  | AAGTGTGGATGGGGAAGTGAGTGCCCGTTCTGTGTGCACAATTGGCAATCCAAGATGGATGGATTCAACACAGGGATATAGCGAG<br>CTACGTGGTGGTGCAGGATATAGCAACGGATATTTATGTTTGACACTTGAGAATGTACGATACAAGCACTGTCCAAGTACAATACTA<br>AACATACTGTACATACTCATACTCGTACCCGGCAACGGTTTCACTTGAGTGCACTGGCTAGTGCTCTTACTCGTACAGGTGCAATAC<br>TGGTATCATAGTCTTTGATGTATATCGTATTCAATCATGTTAGTTGCGT                                                                                                                                                                                                                                                                                                                                                                                                                                                                                                                                                                                                                                                            |
|                   | tLIP2  |  |  | CTTCTGTTCCGGAATCAACCTCAAGGTTAACGGCCACGATCCCTCGTTGTTACTCTTGGTCAGCCCATTGTGCGTAACGCTGGCTTTGCT<br>AACTGGGTCGATAAACTCTTCTTTGGCCAGGAGAACCCCGATGTCTCAAGGTGTCAAAGACCGAAAGCTTACCGAATCACCCACC<br>GAGGAGATATCGTCCCTCAAGTGCCCTTCTGGGACGGTTACCAGCACTGCTCTGGTGAGGTCTTTATTGACTGGCCCTGATCCACCCT<br>CCTCTCTCAACGTTGTCATGTGCCAGGGCCAGAGCAATAAACAGTGCTCTGCCGGTAACACTCTGCTCCAGCAGGTCAATGTGATTG<br>GAAACCATCTGCAGTACTTCGTACCCGAGGGTGTCTGTGGTATCTAAGCTATTTACTCTTTACAACCTTCTACCTCAACTATCTACTTT<br>AATAAATGAATATCGTTTATTCTCTATGATTACTGTATATGCGTTCCTCTAAGACAAATCGAAACCAGCATGCGATCGAATGGCATA<br>AAAGTTTCTCCGAAGTTGATCAATGTCTGATAGTCAGGCAGCTTGAGAAGATTGACACAGGTGGAGGCCGTAGGGAAACCGATCAA<br>CCTGTCTACCAGCGTTACGAATGGCAAATGACGGGTTCAAAGCCTTGAATCCTTGCAATGGTGCCTTGGATACTGATGTCACAACTTA<br>AGAAGCAGCCGTTGCTCTTCTCGAAACTCTCAAACACAGTCCAGAAGTCTTTATAGTTTGATCTGTATCCAGATAGCCTCCGTA<br>ATTGGTGTGTCTTCAAATCCAGACGTCCACATTGGCATGTCTCCACTGATAAGCATTGAAAGTTCATCTGCGTTGAACATTGAGA<br>CCCACGAAGGGTCAATGAGCTGGTATAGACCCCAAGAATGCATCTG |
|                   | tPEX16 |  |  | GCGATTGATGATTGGAAACACACACATGGGTTATATCTAGGTGAGAGTTAGTTGGACAGTTATATATTAATCAGCTATGCCAACGGT<br>AACTTCATTCATGTCAACGAGGAACCAAGTACTGCAAGTAATATAGAATTTGACCACCTTGCCATTCTCTTGCACTCCTTTACTATATCT<br>CATTTATTTCTTATATACAAATCACTTCTTCTCCAGCATCGAGCTCGGAAACCTCATGAGCAATAACATCGTGGATCTCGTCAATAGA<br>GGGCTTTTGGACTCCTTGCTGTTGGCCACCTTGCTCTTGTCTGGCTCATTCTGTTTCAACGCCCTTTCGCGCCAGACCATCAACCTT<br>GTTGAGCTCTCCGTGAGCAGCTCGACCAGATCATCAAACCAAGACCTTGGCTCGAGTTCGGGCTTCTCGAAGCTT                                                                                                                                                                                                                                                                                                                                                                                                                                                                                                                                 |

|             |     |              |               |                                                                                                                                                                                                                                                                                                                                                                                                                                                                                                                                                                                                                                                                                                                                                                                                                                                                                                                                                                                                                                                                                                                                                                                                                                                                                                                                                                                                                                                                                                                                                                                                                                                                                                                                                                  |
|-------------|-----|--------------|---------------|------------------------------------------------------------------------------------------------------------------------------------------------------------------------------------------------------------------------------------------------------------------------------------------------------------------------------------------------------------------------------------------------------------------------------------------------------------------------------------------------------------------------------------------------------------------------------------------------------------------------------------------------------------------------------------------------------------------------------------------------------------------------------------------------------------------------------------------------------------------------------------------------------------------------------------------------------------------------------------------------------------------------------------------------------------------------------------------------------------------------------------------------------------------------------------------------------------------------------------------------------------------------------------------------------------------------------------------------------------------------------------------------------------------------------------------------------------------------------------------------------------------------------------------------------------------------------------------------------------------------------------------------------------------------------------------------------------------------------------------------------------------|
| <b>Gene</b> | XDH | YALIOE12463g | YALI1_E15452g | <p>ATGTCCTTAACCCGTCATTTGTTCTTCGAAAGCCATTGGATCTCGTCTTTGAGGATCGGCCCGACCCCAAGATCCAGGACCCCACTCC<br/> GTC AAGGTGGCAGTCAAAAAGACCGGAGTTTGGCGCTCGGATGTCCACTACTATCTGCATGGAGGAATCGGCGACTTCATTGTCAAG<br/> GCTCCCATGGTTCTAGGCCATGAAAGTGCCGGAGAGGTGGTTGAGTTGGTCTGAAAGTCAAGGACCTCAAGGTGGGAGATCGAGT<br/> GGCTCTCGAGCCGGAGTGCCGTCTCGATTGTACAGGAGTACAAGGAGGGACGATACAACCTGTGTCTTGCATGGTGTGGTCTCGAGGA<br/> ACCCCTCCCTACGACGGTACTCTGTGTCGTCACATACATCATTCCCGAGGACTTTTGTGTCAAGCTGCCTGATCATGTGTCTCTCGAGGA<br/> GGGAGCTCTTGTGGAGCCTGTCCGTGGCTGTCCACTGCAACAAGCTGGCCAAGACCACTGCCAGGACGTGGTTATTGATTTTGGGA<br/> GCTGGCCAGTCGGACTGTAGCCGTGGGAGTGGCCAATGCCTTTGGATCATCTACCATTGTGTGTGTTGATCTTGTCCCGAGAAGC<br/> TGGAGCTCGCCAAGAAGTTCGGTGCCACTCATACGTTTGTACCACCTAAGGGAGACAGTCCCAACGAGTCTGCTGACAAGATCCGAGC<br/> TCTGATCAAGGGCGCTGGTCTCTGACTCGCCAATGTGGCTTTGGAGTGCACCGGAGCTGAGCCTTCTATTCAAGACTGCTGTTTCTG<br/> TGCTGGCCACTCCGGTCGACTTGTGACAGTGGCATGGGCAAGGATGACGTCAACTTCCCTATCACCAAATGCATTGTAAAGGAGAT<br/> TACCGTCTCGGATCGTTCCGATACTGCCATGGTACTATCCCTGGCTGTTGAGCTGGTTGCTTCTGGCAAGATTGACGTCGAAGAAGC<br/> TGGTGACCAACCGGTTACCTTCAAGGAGGCTGAGCAGGCGTACAAGACGGCGGCCGAGGGCAAGGCCATCAAGATCATCATTGAC<br/> GGTCCCGAGGAGGAGTAG</p>                                                                                                                                                                                                                                                                                                                                                                                                                                                                                                                                                                             |
|             | XK  | YALIOF10923g | YALI1_F14583g | <p>ATGTATCTCGGACTGGATCTTTGACTCAACAGCTCAAGGGCATCATTCTGGACACAAAACGCTGGACACGGTCACACAAGTCCATG<br/> TGGACTTTGAGGACGACTTGCCGAGTTCAACACCGAAAAGGGCGTCTTTCACAGCTCTACAGTGGCCGGAGAAATCAATGCTCTGT<br/> GGCAATGTGGGGGCGAGCTGTGGACTTGTGATAGAGCGTCTGTCAAAGGAAATAGACCTTCCACGATCAAGTTTGTGCGGGCTC<br/> GTGCCAGCAACACGGCTCTGTTTATCTCAACAGCAGCTACAAGGAGGGCCTGGGTTCTCTGGACAAACACAAAGACTTGTCTACAGGA<br/> GTGTCATCCTTACTGGCGCTCGAAGTCAGCCCAATTGGCAGGATGCAAGCACGGAGAAGGAGTGTGCGCAGTTTGGAGCTGCAGTC<br/> GGCGTCCCGAGCAGTGGCTGAGATCACTGGCTCTCGAGCACATACTCGTTTACCAGGGCCCAAGATTCTCAAGTCAAGGAACGC<br/> AACCCCAAGGATTCAAGGCCACGTACGGGTCCAGCTCATATCCAATTTCTAGCATCTGTTTGGCCGCAAGGGCTGCCCTTTGA<br/> TCTTGCTGACGCCTGTGGAATGAATCTGTGGGACATCCAGAATGGCCAGTGGTGAAGAACTCACAGATCTCATACCGATGACACC<br/> CACTCGGTGAGTCCCTCCTTGGAGACGTGGAACAGACCCCAAGGCTCTACTGGGCAAAATCTCGCCCTATTTGCTCTCAAGGGCT<br/> TCTCTCCCTCTTGTGAGGTGGCACAGTTTACAGGCGACAACCCAGGCACTATGCTGGCTCTCCCTTACAGGCCAATGACGTGATTGTG<br/> TCTTTGGGAACATCTACGACCGCCCTGTCGTAACAAACAAGTACATGCCGACCCCGATACCATGTGTTCAACACCCCATGGAGG<br/> GATACATGGGCATGCTGTGCTACTGCAACGGAGGTCTAGCACGAGAGAAGATCCGAGACGAGCTTGGAGGCTGGGACGAGTTAAT<br/> GAGGCGGCCGAGACCACCAACACAGTGTCTGCTGACGATGTCATGTTGGCATCTACTTTCACTACGAGAAATCCTTCTCGAGCAG<br/> GTCCCTTTGAACGACGTTTCTATCTACAACAGACAAAGTGAACAGCTTACAGAGATGGCTTCTCCAGAGGACTCACTGGCAACCGAACA<br/> CAAACCGCAGGCTCAAATCTCAAGGACAGTGGCCGCCACAAATGGACGCCACTGCCATCATTCAAAGCCAGGCCCTCAGTATCAAA<br/> ATGAGACTCCAACGCATGATGATGGCGATATTGAAAGGTGATTTTGTGGGAGGCGCTCGGTCAACACTGCTATCTGCAGCGTAA<br/> TGTCTGCCATCTTAAACCAACAAGGGCGCTGGAGATGTGGTCTGGAAATGGCAAACGCTTGTGCCATTGGAAGTGGCCATCACGC<br/> CTGGCTTTCGACCCCAACAAGACAGGCCAGGTACAGGTTACGAAGAAGAGGTCAAATACAAGAATGTGGACACAGACGTGCTACT<br/> CAAGGCGTTCAAGCTGGCCGAAAACGCCTGCCTGGAGAAATAA</p> |



|             |      |              |               |                                                                                                                                                                                                                                                                                                                                                                                                                                                                                                                                                                                                                                                                                                                                                                                                                                                                                                                                                                                                                                                                                                                                                                                                                                                                                                                                                                                                                                                                                                                                                                                                                                                                |
|-------------|------|--------------|---------------|----------------------------------------------------------------------------------------------------------------------------------------------------------------------------------------------------------------------------------------------------------------------------------------------------------------------------------------------------------------------------------------------------------------------------------------------------------------------------------------------------------------------------------------------------------------------------------------------------------------------------------------------------------------------------------------------------------------------------------------------------------------------------------------------------------------------------------------------------------------------------------------------------------------------------------------------------------------------------------------------------------------------------------------------------------------------------------------------------------------------------------------------------------------------------------------------------------------------------------------------------------------------------------------------------------------------------------------------------------------------------------------------------------------------------------------------------------------------------------------------------------------------------------------------------------------------------------------------------------------------------------------------------------------|
| <b>Gene</b> | XR   | YALI0D07634g | YALI1_D09870g | <p>ATGTCCTTCAAGCTCGCCTCCGGAAAGTCCATGCCAAGGTCGGATTGGCCTGTGGAAGGTCCCCGTGACAAGACCGCCGACCCG<br/> TCTACGGAGCCATCAAGAACGGTTACAGACTGTTTGACGGCGCCTTCGACTACCAGAACGAGCGAGAGGCCGGGAAGGTATCCGAC<br/> GAGCCATCAAGGATGGCTGGTCAAGCGAGAGGACATCTTCATACCACCAAGTTGTGGAACACCTTCCACTCAAAGGAGCACGCTCT<br/> GCAGATCGCCAAGGAGCAGAACGAGTGGTGGGGACTCGACTACATCGATCTCTACCTCATCCACTTCCCATCCCATGCAGTACATT<br/> CCCATCTCCGAGAAGGAGTGGGCTGGATGGACCAACGCCACTGACTCGGGTCTAACCCTCTGGCCAAGATCCCTACCCGAGAGACCT<br/> GGGAGGCTCTCGAGGAGCTAGTTGATACCAGGAATCGCCAAGTCCATTGGTGTCTCCAATTACCCGCCAGAACATTTACGACGTCCA<br/> GACCTACAACAAGCACCCATTCTGCTCTGCAGATTGAGCACCACCCCTACCTGGTGCAGCCCCAGCTGACCCAGCTCGAAAGGAC<br/> AACACATCCAGGTCACTGCCTACTTTTTCGGCCCCGCTCCTTTGTGGAGATTGGCATGGACCAGAAGTCCCTCTCTTTTCGA<br/> GAACGAGACCATCACAAGATCGCCAAGGCTCACAACAAGACCCCTCCCAGGTTCTGCTGCGATGGGCTACCCAGCGAGGCATTGC<br/> CGTCATCCCCAAGTCCAACAACGTCGAGCGACAACTCAGAACCTCGAATCTCTGGACTTTGACCTGACCCGAGGCCGAGATTAAGGAG<br/> ATCTCCAACCTCAACAAGAACCTGCGATTCAACGATCCCGGTGTCTACGCTAACCTTCCCATTTTCGCTAA</p>                                                                                                                                                                                                                                                                                                                                                                                                                                                                                                                                                                                                                             |
|             | DGA1 | YALI0E32769g | YALI1_E38810g | <p>(ATG)ACTATCGACTCACAATACTACAAGTCGCGAGACAAAAACGACACGGCACCCAAAATCGGGGAATCCGATATGCCCGCTATCG<br/> ACACCATTACTCAACCGATGTGAGACCTTCTCTGGTCTGGCACAATTTTACGATTCCCACTTCTCACAATTTTCATGCTATGCTGCG<br/> CAATTCACCTGCTCTGGCCATTTGTGATTGCGTATGTAGTGTACGCTGTTAAAGACGACTCCCGTCCAACGGAGGAGTGGTCAAGCG<br/> ATACTCGCCTATTTCAAGAACTTCTTCATCTGGAAGCTCTTTGGCCGCTACTTCCCATAACTCTGCACAAGACGGTGGATCTGGAGC<br/> CCACGCACATACTACCTCTGGACGTCCAGGAGTATCACCTGATTGCTGAGAGATACTGGCCGAGAACAAGTACCTCCGAGCAAT<br/> CATCTCCACCATCGAGTACTTTCTGCCGCTTCATGAAACGGTCTTTCTATCAACGAGCAGGAGCAGCCTGCCGAGCGAGATCCTC<br/> TCCTGTCTCCGTTTCTCCAGCTCTCCGGTCTCAACTGACAAGTGGATTAACCACGACAGCAGATATAGCCGTGGAGAATCATCT<br/> GGTCCAACGGCCACGCTCGGGTCCGAACCTAACGGCAACGGCAACAATGGCACCCTAACCGACGACCTTTGTGCTCCGCTCTG<br/> CTGGCTCCACTGCATCTGATTCCACGCTTCTAACGGGTCCTCAACTCCTACGCCAACCCAGATCATTGGCGAAAACGACCCACAGCTG<br/> TCGCCCACAAAACCAAGCCCACTGGCAGAAAATACATCTTCGGTACCACCCACGGCATTATCGGCATGGGAGCCTTTGGTGGAA<br/> TTGCCACCGAGGGAGCTGGATGGTCCAAGCTTTTCCGGGCATCCCTGTTTCTTATGACTCTCACAACAACCTCCGAGTGCCTCTCT<br/> ACAGAGAGTACCTCATGAGTCTGGGAGTCGCTTCTGTCTCAAGAAGTCTGCAAGGCCCTCCTAAGCGAAAACCACTCATCTGCAT<br/> TGTCGTTGGTGGAGCACAGGAAAGTCTTCTGGCCAGACCCGGTGTGATGGACCTGGTACTCAAGCGAAAAGGTTTTGTTGACTT<br/> GGTATGGAGGTCGGAAATGTCGCCCTTGTCCCATCATGGCCTTTGGTGGAGAACGACCTCTATGACCAGGTTAGCAACGACAAGTCGT<br/> CCAAGCTGTACCGATTCCAGCAGTTTGTCAAGAATTCCTTGGATTACCCTTCTTTGATGCATGCCGAGGGCTTCAACTACGAT<br/> GTCGGTCTTGTCCCTACAGGCGACCCGTCAACATTGTGGTGGTTCCTTACTTACTTATCTCCACACCCACCCGACGAAGA<br/> AGTGTCCGAATACCACGACCGATACATCGCCGAGCTGCAGCGAATCTACAACGAGCACAAGGATGAATATTTTCATCGATTGGACCGA<br/> GGAGGGCAAAGGAGCCCCAGAGTTCGAATGATTGAGTAA</p> |
